# Supplementary material for: Increased levels of a mycophenolic acid metabolite in patients with kidney failure negatively affect cardiomyocyte health
Source: Frontiers journal article supplement (doi:10.3389/fcvm.2024.1346475), 2024-03-06
Supplement: Data_Sheet_1.pdf [file Data_Sheet_1.pdf]

## SUPPLEMENTAL MATERIAL

### Supplemental Tables

**Suppl. Table 1. Detailed acquisition parameters of the NMR analysis.**

| Experiment | Bruker library name | AQ (F2) | D1     | Mixing time | Scans | Increments | 1J(H,C) | longJ(H,C) |
|------------|---------------------|---------|--------|-------------|-------|------------|---------|------------|
| 1D 1H      | noesypr1d           | 5 s     | 5 s    | 10us        | 32    | /          | /       | /          |
| 1D 13C     | zgig                | 2.4 s   | 12.6 s | /           | 15392 | /          | /       | /          |
| COSY       | cosydfgpph19        | 1.27 s  | 0.72 s | /           | 8     | 1060       | /       | /          |
| HSQC       | hsqcetgpprsisp2.2   | 0.25 s  | 1.25 s | /           | 16    | 420        | 150     | /          |
| HMBC       | hmbcgp1pndprqf      | 1 s     | 0.5 s  | /           | 160   | 327        | 150     | 9          |

**Suppl. Table 2. Detailed chemical shifts obtained in the NMR analysis of the bioactive fraction.**

| Carbon Nr. (Figure 2D) | 13C-chemical shift (ppm) | Attached 1H- chemical shift (ppm) |
|------------------------|--------------------------|-----------------------------------|
| 1                      | 13.95                    | 2.17                              |
| 2                      | 18.61                    | 1.79                              |
| 3                      | 26.56                    | 3.48                              |
| 4                      | 35.55                    | 2.47                              |
| 5                      | 36.88                    | 2.28                              |
| 6                      | 64.21                    | 3.80                              |
| 7                      | 72.82                    | 5.27                              |
| 8                      | 74.45                    | 3.64                              |
| 9                      | 76.60                    | 3.69                              |
| 10                     | 78.41                    | 3.81                              |
| 11                     | 78.46                    | 3.63                              |
| 12                     | 106.47                   | 5.30                              |
| 13                     | 115.15                   | /                                 |
| 14                     | 125.86                   | /                                 |
| 15                     | 126.21                   | 5.18                              |
| 16                     | 133.29                   | /                                 |
| 17                     | 137.66                   | /                                 |
| 18                     | 151.24                   | /                                 |
| 19                     | 153.97                   | /                                 |
| 20                     | 165.65                   | /                                 |
| 21                     | 174.98                   | /                                 |
| 22                     | 175.72                   | /                                 |
| 23                     | 181.75                   | /                                 |

## Supplemental Figures

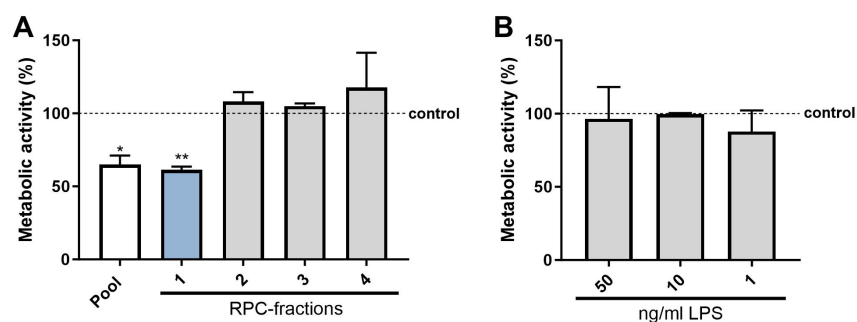

**Suppl. Figure 1: Analyses of effects on overall metabolic activity of cardiomyocytes.** (A-B) Overall metabolic activity measured using an MTT assay of cardiomyocytes treated (A) with dialysate fractions obtained through reversed-phase chromatography (RPC) with continuous gradient or pool or (B) with lipopolysaccharide (LPS) in comparison to unstimulated cells. (A, B) Unstimulated controls within each independent experiment were set to 100%, as indicated by the horizontal lines. Shown are means  $\pm$  SD ( $n=3$ ). \*\* $P<0.01$ , \*\* $P<0.01$  using one-sample t-test or Wilcoxon test with Bonferroni-Holm correction for multiple group comparison to a fixed reference value (Control cells).

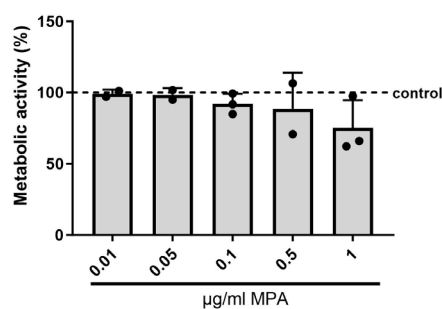

**Suppl. Figure 2: Characterization of effects of MPA on cardiomyocyte viability.** Effects of different concentrations of MPA on cardiomyocytes in terms of overall metabolic activity (as % relative to control cells). Unstimulated control cells within each independent experiment were set to 100%, as indicated by the horizontal line. Shown are means  $\pm$  SD;  $n=2-3$ , as indicated. One-sample t-test with Bonferroni-Holm correction for multiple group comparison to a fixed reference value (Control cells).

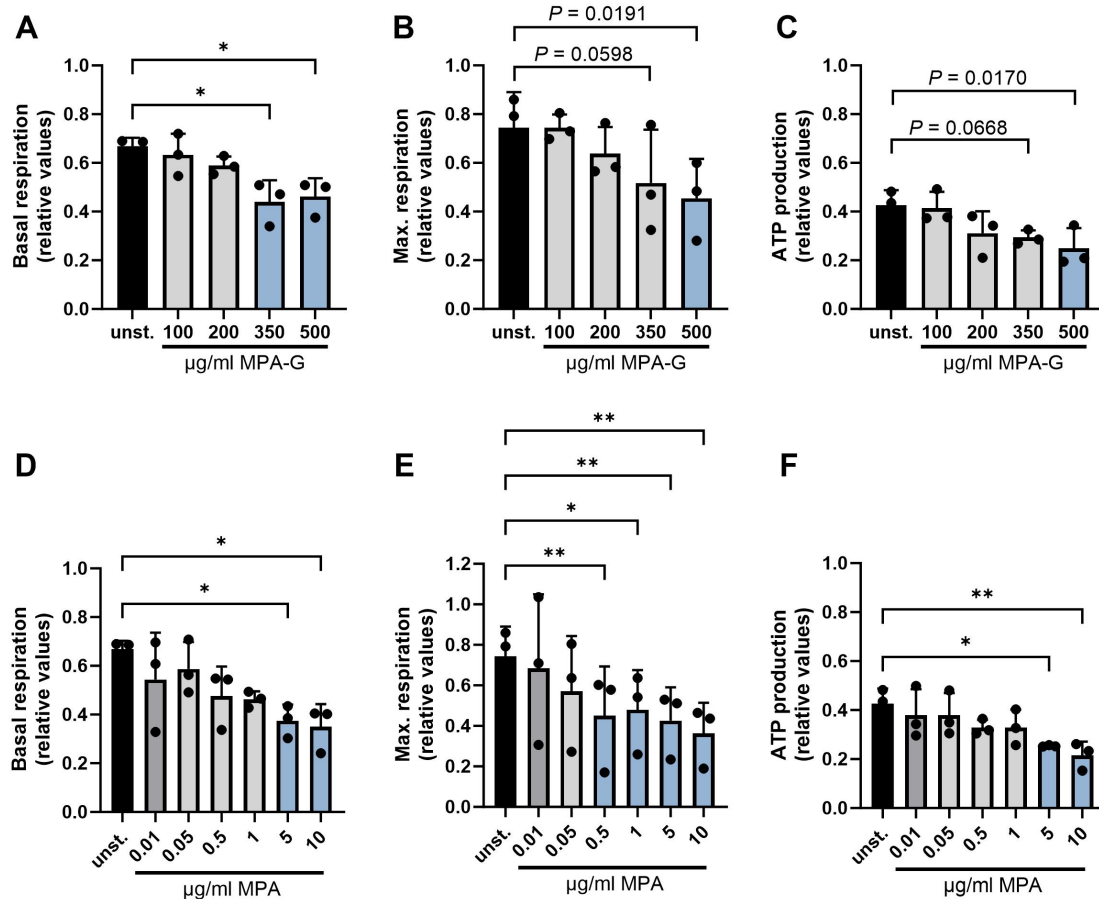

**Suppl. Figure 3: Characterization of effects of MPA and MPAG on mitochondrial activity of cardiomyocytes.** Effects of different concentrations of MPA-G or MPA on the oxygen consumption rate of cardiomyocytes (OCR, normalized within each experiment to control cells at the starting point, resulting in relative values, as shown in Figure 4A,C), followed by the quantification of the following phases: (A,D) Basal respiration; (B, E) Maximal respiration; and (C, F) ATP production. (A-F) Shown are means  $\pm$  SD;  $n=3$ ; \* $P<0.05$ , \*\* $P<0.01$ , for comparison of each MPA-G/MPA concentration to unstimulated control cells (unst). Repeated-measures one-way ANOVA with Dunnett's multiple comparisons test (A-C, E-F) or Friedman test with Dunn's multiple comparisons test (D).
